# Supplementary material
Source: publisher site journal article supplement (https://www.dovepress.com/article/333004)

Appendix 1. Data used in this paper. Please note that most analyses presented in this paper used logarithmically transformed variables.

| **Country** | **Meat, kg.capita.yr, 2011-13** | **Life e(0)  2010-2015 UN, years** | **Life e5, UN 2010-15**  **years** | **Mortality < 5 yo, 2011-13 average, WB**  **Per 1,000** | **Calories per day 2011-13** | **GDPPPP 2011 WB, $** | **URBAN population % 2011 WB** | **%BM I≥ 30, 2014, 18+ WHO** | **CHO Crops (Cereals, Root, Sugar) 2011-13**  **Kg/capita/yr** | **Percentage of population ages 25+ that completed primary education.** |
| --- | --- | --- | --- | --- | --- | --- | --- | --- | --- | --- |
| Afghanistan | 12.67 | 62.25 | 62.72 | 80.33 | 2099.00 | 1660.74 | 25.07 | 4.90 | 197.31 |  |
| Albania | 60.69 | 77.66 | 73.95 | 11.23 | 3169.67 | 10207.70 | 53.25 | 20.50 | 236.77 | 94.35 |
| Algeria | 20.65 | 75.27 | 72.74 | 26.23 | 3261.67 | 12990.35 | 68.21 | 26.00 | 310.84 | 32.90 |
| Angola | 34.28 | 60.19 | 61.84 | 105.30 | 2421.33 | 5911.25 | 40.90 | 7.50 | 364.91 |  |
| Antigua and Barbuda | 82.78 | 75.81 | 71.68 | 9.00 | 2359.67 | 18605.32 | 25.67 | 18.00 | 131.23 |  |
| Argentina | 106.28 | 76.01 | 72.24 | 13.30 | 3195.67 | 19629.35 | 91.13 | 27.30 | 213.93 | 91.49 |
| Armenia | 44.29 | 73.99 | 70.19 | 16.73 | 2866.00 | 7022.10 | 63.37 | 19.20 | 218.91 | 99.27 |
| Australia | 118.23 | 82.30 | 77.68 | 4.30 | 3256.67 | 41782.28 | 88.88 | 27.90 | 190.75 | 99.79 |
| Austria | 89.97 | 80.99 | 76.31 | 4.07 | 3747.33 | 44452.73 | 65.86 | 19.20 | 216.12 |  |
| Azerbaijan | 31.02 | 71.57 | 69.21 | 32.67 | 3070.67 | 15754.15 | 53.62 | 18.80 | 326.43 | 97.84 |
| Bahamas | 107.29 | 75.15 | 71.15 | 14.90 | 2636.33 | 22674.73 | 82.61 | 30.50 | 128.55 | 95.28 |
| Bangladesh | 4.11 | 71.25 | 69.28 | 43.83 | 2438.00 | 2570.85 | 31.23 | 3.20 | 245.79 | 47.93 |
| Barbados | 68.34 | 75.37 | 71.20 | 14.70 | 2913.67 | 16472.08 | 31.91 | 22.00 | 209.73 |  |
| Belarus | 88.34 | 72.15 | 67.48 | 4.80 | 3350.00 | 17166.70 | 75.05 | 23.70 | 343.31 |  |
| Belgium | 69.64 | 80.52 | 75.87 | 4.30 | 3722.67 | 41248.73 | 97.69 | 21.40 | 267.29 | 92.65 |
| Belize | 49.87 | 69.76 | 65.93 | 17.63 | 2749.00 | 7855.70 | 44.72 | 23.00 | 178.58 | 99.79 |
| Benin | 24.84 | 59.93 | 61.89 | 106.30 | 2609.00 | 1820.89 | 42.26 | 8.90 | 400.54 |  |
| Bermuda | 108.94 |  |  |  | 2656.33 | 54984.51 | 100.00 |  | 129.98 |  |
| Bolivia (Plurinational State of) | 67.17 | 67.72 | 67.91 | 36.73 | 2237.33 | 5598.51 | 66.86 | 19.30 | 229.38 | 59.20 |
| Bosnia and Herzegovina | 33.71 | 76.30 | 71.99 | 6.70 | 3112.67 | 9901.54 | 39.29 | 17.10 | 269.39 |  |
| Botswana | 29.34 | 62.91 | 60.81 | 37.27 | 2313.67 | 13889.27 | 56.47 | 18.20 | 200.73 | 73.10 |
| Brazil | 94.69 | 74.66 | 71.06 | 17.30 | 3265.67 | 14973.10 | 84.62 | 21.10 | 217.30 | 78.38 |
| Brunei Darussalam | 85.04 | 76.71 | 72.31 | 10.00 | 2965.33 | 82434.88 | 75.87 | 13.10 | 206.65 | 69.16 |
| Bulgaria | 55.65 | 74.25 | 69.99 | 9.83 | 2791.67 | 15676.05 | 72.64 | 24.10 | 207.37 |  |
| Burkina Faso | 14.69 | 58.71 | 60.09 | 112.57 | 2697.00 | 1472.72 | 26.51 | 5.00 | 236.48 |  |
| Cabo Verde | 34.92 | 72.15 | 69.10 | 23.87 | 2588.33 | 771.51 | 10.91 | 11.00 | 202.04 | 49.47 |
| Cambodia | 13.88 | 67.61 | 65.04 | 37.87 | 2445.00 | 5991.78 | 62.62 | 3.50 | 223.92 | 16.20 |
| Cameroon | 13.55 | 56.39 | 57.85 | 101.60 | 2622.00 | 2658.71 | 19.97 | 10.60 | 282.26 | 26.41 |
| Canada | 91.70 | 81.77 | 77.22 | 5.50 | 3484.33 | 2969.05 | 52.10 | 28.30 | 240.39 |  |
| Central African Republic | 34.89 | 49.40 | 52.93 | 135.80 | 2049.67 | 41565.27 | 81.12 | 6.90 | 321.50 |  |
| Chad | 12.26 | 51.67 | 55.39 | 140.67 | 2098.67 | 911.66 | 39.03 | 5.60 | 226.52 |  |
| Chile | 82.34 | 78.82 | 74.53 | 8.40 | 2964.33 | 1863.85 | 22.05 | 27.00 | 254.62 | 84.21 |
| China | 59.99 |  | 71.70 | 13.53 | 3095.33 | 20437.70 | 88.79 | 5.50 | 168.81 |  |
| China, Hong Kong SAR | 154.86 | 83.40 | 78.62 |  | 3276.67 | 10384.37 | 50.57 |  | 159.76 | 92.70 |
| China, Macao SAR | 115.60 | 83.29 | 78.63 |  | 2896.33 | 50085.96 | 100.00 |  | 227.24 | 86.41 |
| China, mainland | 59.17 | 75.67 |  | 40.60 | 3096.33 | 116752.21 | 100.00 |  | 147.99 |  |
| China, Taiwan Province of | 78.05 | 79.25 | 74.66 |  | 2969.33 |  |  |  | 220.86 |  |
| Colombia | 48.51 | 73.74 | 70.63 | 17.23 | 2750.67 | 11496.48 | 75.32 | 21.40 | 345.35 | 75.54 |
| Congo | 30.34 | 62.55 | 61.99 | 107.33 | 2183.67 | 5213.95 | 63.67 | 8.90 | 182.85 | 45.66 |
| Costa Rica | 49.25 | 79.16 | 75.06 | 9.90 | 2860.00 | 13397.23 | 72.87 | 24.30 | 423.99 | 80.49 |
| Côte d'Ivoire | 14.58 | 51.70 | 52.39 | 100.10 | 2787.67 | 2511.42 | 51.31 | 9.40 | 208.45 | 27.82 |
| Croatia | 65.18 | 77.05 | 72.44 | 5.20 | 3017.00 | 20704.31 | 57.80 | 23.40 | 295.52 | 95.44 |
| Cuba | 51.13 | 79.16 | 74.71 | 5.97 | 3346.67 |  | 76.69 | 23.60 | 153.83 | 90.32 |
| Cyprus | 78.64 | 79.93 | 75.31 | 3.17 | 2657.33 | 33192.38 | 67.41 | 21.10 | 232.73 | 92.15 |
| Czechia | 76.27 | 78.17 | 73.41 | 3.20 | 3250.00 | 28797.42 | 73.19 | 25.20 | 215.35 | 99.88 |
| Democratic People's Republic of Korea | 13.95 | 70.79 | 67.55 | 25.80 | 2099.67 |  | 60.32 | 6.30 | 249.75 |  |
| Denmark | 77.84 | 80.14 | 75.48 | 4.10 | 3348.67 | 44403.39 | 86.96 | 18.90 | 214.35 |  |
| Djibouti | 17.95 | 61.62 | 62.13 | 71.83 | 2552.00 | 2705.41 | 77.05 | 12.90 | 268.52 |  |
| Dominica | 55.19 |  |  | 26.93 | 2947.33 | 10135.27 | 68.39 | 26.80 | 148.94 |  |
| Dominican Republic | 47.11 | 73.19 | 70.34 | 33.23 | 2583.00 | 11320.90 | 74.93 | 26.10 | 138.38 | 65.71 |
| Ecuador | 53.95 | 75.54 | 72.50 | 16.77 | 2355.67 | 9926.90 | 62.89 | 19.00 | 322.81 | 78.10 |
| Egypt | 29.15 | 70.84 | 67.58 | 26.40 | 3544.00 | 9823.82 | 43.00 | 30.60 | 195.13 |  |
| El Salvador | 28.84 | 72.63 | 69.09 | 17.47 | 2557.67 | 7428.03 | 64.79 | 23.40 | 270.46 | 53.26 |
| Estonia | 63.29 | 76.76 | 72.09 | 3.90 | 3258.00 | 24543.07 | 67.97 | 20.70 | 230.45 |  |
| Ethiopia | 7.40 | 63.69 | 63.27 | 73.50 | 2119.33 | 1162.78 | 17.74 | 4.00 | 301.68 | 14.21 |
| Fiji | 45.58 | 69.72 | 66.13 | 23.63 | 2932.33 | 7488.83 | 52.21 | 28.90 | 210.81 |  |
| Finland | 76.77 | 80.69 | 75.93 | 2.73 | 3332.00 | 40683.53 | 83.69 | 21.40 | 219.31 |  |
| France | 88.51 | 81.89 | 77.22 | 4.17 | 3485.33 | 37457.28 | 78.58 | 20.80 | 189.26 | 97.76 |
| French Polynesia | 101.74 | 76.14 | 71.72 |  | 2930.33 |  | 56.35 |  | 302.34 |  |
| Gabon | 68.04 | 64.46 | 63.35 | 56.90 | 2799.00 | 15893.52 | 86.05 | 14.30 | 219.27 |  |
| Gambia | 7.62 | 60.31 | 60.14 | 67.37 | 2657.33 | 1524.76 | 57.01 | 9.50 | 289.42 |  |
| Georgia | 27.48 | 72.75 | 68.70 | 12.17 | 2849.67 | 7315.09 | 53.02 | 20.50 | 225.19 | 98.65 |
| Germany | 86.76 | 80.45 | 75.77 | 4.03 | 3512.67 | 42692.52 | 74.49 | 21.50 | 507.06 | 100.00 |
| Ghana | 17.06 | 61.68 | 61.12 | 62.83 | 3020.33 | 3404.46 | 51.39 | 10.10 | 231.80 | 57.01 |
| Greece | 76.62 | 80.62 | 75.94 | 4.03 | 3410.33 | 26141.32 | 76.65 | 24.00 | 145.42 | 91.77 |
| Grenada | 60.33 | 73.17 | 69.13 | 15.53 | 2437.00 | 11220.83 | 35.63 | 20.20 | 191.98 |  |
| Guatemala | 27.40 | 72.44 | 69.86 | 31.93 | 2440.00 | 6844.50 | 49.77 | 20.00 | 270.20 | 46.16 |
| Guinea | 10.05 | 57.93 | 59.41 | 113.43 | 2557.67 | 1625.57 | 35.30 | 7.00 | 211.33 | 9.12 |
| Guinea-Bissau | 16.58 | 56.00 | 59.52 | 102.83 | 2319.67 | 1475.39 | 46.08 | 8.70 | 215.92 |  |
| Guyana | 42.46 | 66.26 | 64.06 | 35.73 | 2709.67 | 6130.84 | 28.27 | 19.00 | 209.42 |  |
| Haiti | 18.26 | 62.29 | 62.43 | 75.90 | 2090.67 | 1562.28 | 53.46 | 21.00 | 190.18 |  |
| Honduras | 33.88 | 72.88 | 70.89 | 21.53 | 2631.33 | 4046.08 | 52.32 | 20.10 | 199.54 | 58.02 |
| Hungary | 70.31 | 75.40 | 70.82 | 5.73 | 3036.67 | 22841.21 | 69.35 | 25.40 | 173.97 | 99.51 |
| Iceland | 90.06 | 82.19 | 77.37 | 2.47 | 3374.67 | 39465.85 | 93.73 | 21.10 | 202.65 |  |
| India | 3.98 | 67.58 | 66.28 | 52.07 | 2449.67 | 4635.88 | 31.28 | 3.50 | 270.73 | 40.33 |
| Indonesia | 13.13 | 68.60 | 65.72 | 31.33 | 2753.00 | 8837.82 | 50.71 | 6.10 | 265.28 | 73.43 |
| Iran (Islamic Republic of) | 33.76 | 75.06 | 71.37 | 18.03 | 3069.67 | 18192.11 | 71.20 | 24.60 | 213.48 |  |
| Iraq | 18.87 | 69.19 | 66.86 | 32.53 | 2522.00 | 13261.60 | 69.10 | 29.20 | 266.80 | 74.44 |
| Ireland | 82.60 | 80.85 | 76.18 | 4.00 | 3599.33 | 45179.83 | 62.11 | 24.00 | 214.62 |  |
| Israel | 97.50 | 81.91 | 77.25 | 4.27 | 3586.33 | 30558.39 | 91.89 | 25.50 | 226.69 | 93.89 |
| Italy | 85.73 | 82.34 | 77.64 | 3.80 | 3576.33 | 36347.34 | 68.44 | 19.30 | 231.37 | 92.67 |
| Jamaica | 62.26 | 75.45 | 71.81 | 17.17 | 2756.00 | 8099.16 | 53.93 | 23.50 | 170.72 | 99.35 |
| Japan | 49.33 | 83.27 | 78.53 | 3.03 | 2726.00 | 35774.70 | 91.25 | 3.90 | 236.29 | 99.54 |
| Jordan | 45.51 | 73.81 | 70.29 | 19.13 | 3126.67 | 9214.21 | 82.72 | 34.30 | 252.39 | 79.65 |
| Kazakhstan | 68.81 | 69.07 | 65.28 | 16.40 | 3219.33 | 21277.71 | 53.58 | 20.00 | 231.30 | 99.93 |
| Kenya | 14.91 | 65.40 | 64.18 | 54.47 | 2189.33 | 2556.87 | 23.97 | 6.50 | 264.55 | 47.13 |
| Kiribati | 31.44 | 65.68 | 64.86 | 61.87 | 3040.67 | 1706.48 | 43.86 | 44.70 | 245.53 |  |
| Kuwait | 84.62 | 74.29 | 70.08 | 9.63 | 3469.67 | 77459.54 | 98.28 | 36.80 | 294.34 | 64.28 |
| Kyrgyzstan | 34.66 | 70.27 | 66.92 | 26.17 | 2788.00 | 2920.60 | 35.34 | 15.50 | 226.31 |  |
| Lao People's Democratic Republic | 20.57 | 65.40 | 64.60 | 61.83 | 2410.67 | 4244.46 | 34.25 | 4.70 | 277.59 |  |
| Latvia | 64.54 | 73.92 | 69.49 | 6.63 | 3143.33 | 19773.24 | 67.62 | 23.00 | 230.19 | 100.00 |
| Lebanon | 41.90 | 78.93 | 74.78 | 9.40 | 3094.33 | 15693.69 | 87.30 | 30.80 | 299.71 |  |
| Lesotho | 22.67 | 52.50 | 52.02 | 95.50 | 2542.00 | 2500.01 | 25.25 | 15.70 | 250.88 |  |
| Liberia | 15.91 | 60.70 | 60.88 | 95.83 | 2219.33 | 734.33 | 48.17 | 9.20 | 294.38 |  |
| Lithuania | 74.68 | 73.99 | 69.39 | 5.27 | 3405.33 | 22854.21 | 66.67 | 25.60 | 231.76 | 98.34 |
| Luxembourg | 98.14 | 81.15 | 76.47 | 2.93 | 3537.00 | 92005.02 | 88.91 | 21.70 | 295.68 |  |
| Madagascar | 14.44 | 64.51 | 63.17 | 63.80 | 2065.00 | 1367.54 | 32.56 | 4.80 | 363.24 |  |
| Malawi | 9.72 | 60.71 | 61.31 | 71.23 | 2349.33 | 1051.19 | 15.66 | 5.30 | 207.42 |  |
| Malaysia | 54.79 | 74.74 | 70.34 | 8.00 | 2902.00 | 21818.88 | 71.74 | 14.30 | 188.54 | 89.95 |
| Maldives | 26.74 | 76.31 | 72.11 | 12.23 | 2731.33 | 12602.20 | 41.16 | 7.60 | 259.87 |  |
| Mali | 23.43 | 56.23 | 59.12 | 121.10 | 2860.67 | 1874.70 | 36.79 | 7.90 | 268.18 | 11.73 |
| Malta | 84.54 | 80.28 | 75.77 | 6.87 | 3377.67 | 28609.76 | 94.83 | 28.20 | 212.51 | 98.05 |
| Mauritania | 29.52 | 62.64 | 63.94 | 90.87 | 2851.67 | 3371.99 | 57.35 | 11.80 | 218.53 |  |
| Mauritius | 53.27 | 74.15 | 70.19 | 14.87 | 3045.67 | 16561.77 | 40.37 | 10.20 | 224.94 | 63.35 |
| Mexico | 61.49 | 76.48 | 73.29 | 17.90 | 3049.67 | 15922.90 | 78.12 | 27.80 | 202.11 | 77.91 |
| Mongolia | 78.10 | 68.47 | 65.43 | 25.77 | 2483.67 | 8881.48 | 68.54 | 19.20 | 292.70 | 95.58 |
| Montenegro | 82.21 | 76.39 | 71.93 | 5.20 | 3448.67 | 14472.39 | 63.27 | 22.40 | 340.78 | 95.97 |
| Morocco | 34.57 | 74.86 | 72.39 | 29.03 | 3372.67 | 6688.40 | 58.19 | 24.70 | 379.89 |  |
| Mozambique | 8.31 | 56.08 | 57.42 | 96.33 | 2280.00 | 954.80 | 31.18 | 6.70 | 180.47 | 26.19 |
| Myanmar | 39.29 | 66.01 | 64.99 | 58.23 | 2555.67 | 3898.41 | 31.94 | 5.10 | 262.89 |  |
| Namibia | 28.78 | 61.75 | 59.65 | 50.90 | 2135.33 | 8721.26 | 42.64 | 16.10 | 280.28 |  |
| Nepal | 12.09 | 68.90 | 66.77 | 42.03 | 2647.33 | 2031.09 | 17.17 | 3.70 | 228.78 | 27.60 |
| Netherlands | 84.25 | 81.31 | 76.65 | 4.20 | 3221.67 | 46066.65 | 87.84 | 19.50 | 184.09 | 98.26 |
| New Caledonia | 80.49 | 76.26 | 72.42 |  | 2848.67 |  | 67.90 |  | 212.92 |  |
| New Zealand | 109.50 | 81.32 | 76.76 | 5.90 | 3133.67 | 32734.54 | 86.18 | 29.60 | 204.78 |  |
| Nicaragua | 23.70 | 74.47 | 71.25 | 22.00 | 2580.33 | 4231.50 | 57.54 | 22.50 | 227.92 |  |
| Niger | 16.92 | 58.53 | 61.31 | 108.77 | 2549.33 | 801.60 | 17.77 | 5.00 | 396.52 | 8.90 |
| Nigeria | 9.32 | 51.88 | 53.95 | 131.73 | 2690.33 | 5259.30 | 44.36 | 8.10 | 217.17 |  |
| Norway | 68.37 | 81.61 | 76.85 | 3.00 | 3490.67 | 62145.03 | 79.39 | 22.20 | 196.80 | 99.73 |
| Oman | 61.08 | 76.22 | 72.07 | 11.43 | 3111.67 | 42121.26 | 75.69 | 25.60 | 186.94 | 72.23 |
| Pakistan | 15.95 | 65.86 | 67.05 | 82.83 | 2433.33 | 4309.76 | 37.01 | 7.80 | 188.93 | 34.92 |
| Panama | 65.93 | 77.32 | 73.86 | 18.70 | 2694.00 | 16939.88 | 65.41 | 21.60 | 255.50 | 82.49 |
| Paraguay | 52.14 | 72.74 | 70.38 | 24.40 | 2598.00 | 7504.65 | 58.71 | 19.20 | 275.77 | 73.10 |
| Peru | 21.89 | 74.16 | 71.39 | 18.03 | 2671.33 | 10449.09 | 77.27 | 18.90 | 215.32 | 74.33 |
| Philippines | 34.78 | 68.61 | 65.64 | 30.97 | 2575.33 | 5707.20 | 45.02 | 5.90 | 305.63 | 84.95 |
| Poland | 75.91 | 76.99 | 72.40 | 5.43 | 3445.67 | 22850.64 | 60.78 | 22.30 | 230.67 | 98.29 |
| Portugal | 88.97 | 80.50 | 75.80 | 3.67 | 3475.67 | 26780.21 | 61.17 | 19.90 | 205.23 | 86.53 |
| Republic of Korea | 63.15 | 81.27 | 76.57 | 3.83 | 3337.67 | 31228.51 | 82.04 | 4.40 | 228.09 | 92.02 |
| Republic of Moldova | 38.71 | 70.97 | 67.15 | 16.50 | 2709.00 | 4179.21 | 44.86 | 18.20 | 305.38 | 98.93 |
| Romania | 52.07 | 74.84 | 70.63 | 11.23 | 3346.00 | 18094.96 | 53.96 | 21.60 | 310.40 | 98.10 |
| Russian Federation | 71.28 | 70.30 | 66.02 | 9.80 | 3352.67 | 24074.36 | 73.73 | 22.50 | 338.58 | 99.21 |
| Rwanda | 7.90 | 65.17 | 64.52 | 52.23 | 2237.00 | 1421.19 | 24.92 | 5.30 | 165.85 | 28.12 |
| Saint Kitts and Nevis | 79.09 |  |  | 17.37 | 2479.67 | 21689.30 | 31.82 | 21.60 | 177.66 |  |
| Saint Lucia | 98.54 | 74.81 | 70.92 | 20.00 | 2585.67 | 12112.40 | 18.45 | 18.50 | 225.97 |  |
| Saint Vincent and the Grenadines | 95.50 | 72.74 | 69.27 | 18.60 | 2946.00 | 9871.65 | 49.14 | 22.40 | 233.39 | 91.25 |
| Samoa | 100.04 | 74.09 | 70.70 | 17.97 | 2935.00 | 5667.49 | 19.86 | 46.00 | 169.36 | 99.13 |
| Sao Tome and Principe | 16.54 | 66.14 | 65.53 | 40.20 | 2356.33 | 2695.63 | 62.60 | 11.60 | 202.65 | 82.05 |
| Saudi Arabia | 60.05 | 74.00 | 70.13 | 10.40 | 3209.00 | 48524.63 | 82.30 | 34.10 | 205.88 | 74.98 |
| Senegal | 15.23 | 65.71 | 64.52 | 60.13 | 2442.33 | 2158.18 | 42.50 | 8.20 | 205.58 | 17.12 |
| Serbia | 51.52 | 74.65 | 70.52 | 7.13 | 2726.00 | 12967.83 | 55.26 | 20.70 | 270.96 | 92.82 |
| Sierra Leone | 10.37 | 50.19 | 52.82 | 146.43 | 2371.00 | 1246.25 | 38.56 | 8.00 | 233.57 |  |
| Slovakia | 55.17 | 76.31 | 71.82 | 6.63 | 2928.67 | 25835.00 | 54.41 | 19.80 | 225.80 | 99.80 |
| Slovenia | 77.04 | 80.31 | 75.57 | 2.93 | 3164.33 | 28804.70 | 49.95 | 19.50 | 430.04 | 99.53 |
| Solomon Islands | 14.36 | 69.60 | 67.21 | 24.43 | 2434.33 | 1969.21 | 20.51 | 21.20 | 248.89 |  |
| South Africa | 61.54 | 59.49 | 57.37 | 41.63 | 3012.67 | 12243.88 | 62.75 | 27.20 | 198.58 | 79.10 |
| Spain | 95.16 | 82.51 | 77.81 | 3.60 | 3179.67 | 32068.27 | 78.67 | 23.10 | 197.83 | 88.17 |
| Sri Lanka | 6.42 | 74.63 | 70.36 | 10.60 | 2514.00 | 9213.32 | 18.31 | 4.60 | 160.01 |  |
| Sudan | 26.07 | 63.59 | 63.60 | 71.50 | 2327.67 | 3631.66 | 33.19 | 5.80 | 201.53 |  |
| Suriname | 56.20 | 70.90 | 67.57 | 21.90 | 2730.33 | 14887.94 | 66.28 | 25.40 | 224.77 | 88.14 |
| Swaziland | 23.72 | 54.99 | 54.42 | 72.00 | 2301.67 | 7324.00 | 21.43 | 15.70 | 199.51 |  |
| Sweden | 80.51 | 81.89 | 77.13 | 2.97 | 3168.67 | 43755.06 | 85.21 | 19.80 | 204.49 | 100.00 |
| Switzerland | 73.03 | 82.69 | 78.06 | 4.43 | 3421.33 | 56183.83 | 73.70 | 18.70 | 200.27 |  |
| Tajikistan | 27.41 | 70.37 | 68.96 | 40.60 | 2136.33 | 2211.75 | 26.53 | 13.20 | 198.91 |  |
| Thailand | 28.47 | 74.56 | 70.54 | 12.40 | 2776.00 | 13535.13 | 45.39 | 8.90 | 229.56 | 59.17 |
| The former Yugoslav Republic of Macedonia | 37.23 | 75.15 | 70.91 | 31.90 | 2930.00 | 11611.75 | 56.96 | 21.60 | 230.09 |  |
| Timor-Leste | 36.29 | 67.74 | 66.69 | 56.80 | 2128.67 | 1801.68 | 30.17 | 3.30 | 348.21 |  |
| Togo | 12.12 | 59.07 | 59.43 | 82.93 | 2417.00 | 1233.83 | 38.01 | 7.80 | 225.60 | 17.81 |
| Trinidad and Tobago | 72.29 | 70.24 | 67.45 | 21.50 | 2982.33 | 31012.72 | 8.94 | 17.40 | 275.81 |  |
| Tunisia | 28.39 | 75.05 | 71.58 | 17.73 | 3366.33 | 10120.68 | 66.10 | 25.70 | 285.68 | 64.49 |
| Turkey | 34.46 | 74.83 | 71.23 | 15.87 | 3690.00 | 19660.89 | 71.28 | 30.80 | 242.25 | 81.09 |
| Turkmenistan | 57.50 | 67.30 | 66.26 | 41.80 | 2844.33 | 11212.54 | 48.71 | 17.40 | 208.42 |  |
| Uganda | 12.40 | 58.61 | 59.42 | 67.80 | 2156.00 | 1602.54 | 14.80 | 4.80 | 325.89 | 30.27 |
| Ukraine | 52.58 | 71.11 | 66.86 | 10.70 | 3158.67 | 8281.87 | 68.88 | 23.40 | 208.92 |  |
| United Arab Emirates | 57.51 | 76.71 | 72.26 | 8.13 | 3240.00 | 58404.02 | 84.38 | 30.30 | 257.17 |  |
| United Kingdom | 82.28 | 80.97 | 76.36 | 4.83 | 3414.67 | 36607.98 | 81.57 | 26.60 | 258.80 | 99.82 |
| United Republic of Tanzania | 9.89 | 62.78 | 61.96 | 65.43 | 2200.00 | 2186.13 | 28.80 | 7.60 | 226.81 | 58.98 |
| United States of America | 115.44 | 78.88 | 74.44 | 7.10 | 3672.67 | 49790.67 | 80.94 | 34.90 | 242.08 | 98.82 |
| Uruguay | 76.21 | 76.96 | 73.13 | 9.93 | 3026.00 | 17904.75 | 94.61 | 27.00 | 244.75 | 89.00 |
| Uzbekistan | 34.36 | 70.80 | 68.45 | 28.70 | 2728.00 | 4470.00 | 36.17 | 15.40 | 331.57 | 100.00 |
| Vanuatu | 38.91 | 71.36 | 68.48 | 29.70 | 2831.67 | 2915.30 | 24.89 | 23.90 | 213.35 |  |
| Venezuela (Bolivarian Republic of) | 71.59 | 73.95 | 70.14 | 17.37 | 2708.33 | 16981.34 | 88.81 | 24.80 | 192.38 | 91.05 |
| Viet Nam | 55.94 | 75.56 | 72.42 | 22.33 | 2724.67 | 4715.88 | 31.03 | 1.80 | 204.32 |  |
| Yemen | 19.76 | 64.17 | 63.38 | 55.07 | 2220.00 | 3805.24 | 32.30 | 15.90 | 229.19 |  |
| Zambia | 13.25 | 59.73 | 59.85 | 74.93 | 1920.00 | 3361.11 | 39.15 | 7.40 | 197.70 |  |
| Zimbabwe | 19.80 | 57.63 | 56.73 | 74.33 | 2169.00 | 1667.14 | 33.02 | 14.90 | 225.61 | 75.59 |

Appendix 2. Distributions of residuals around multiple regressions of newborn life expectancy (Life(0)), life expectancy at age 5 years (Life(5)) and child mortality


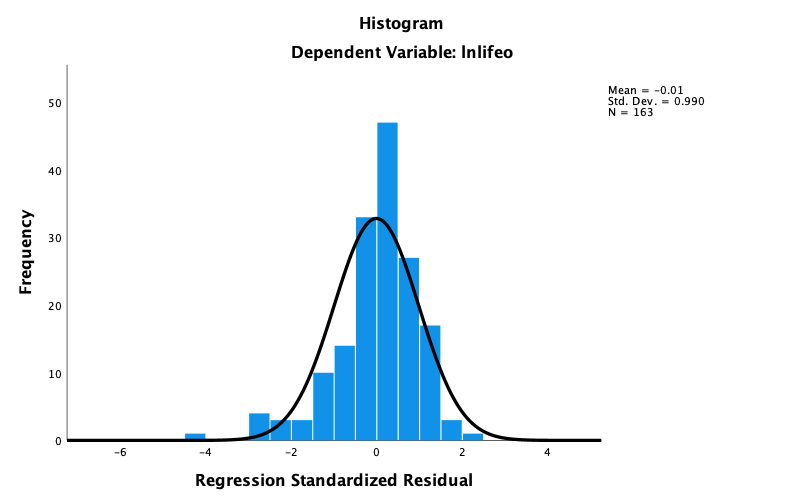


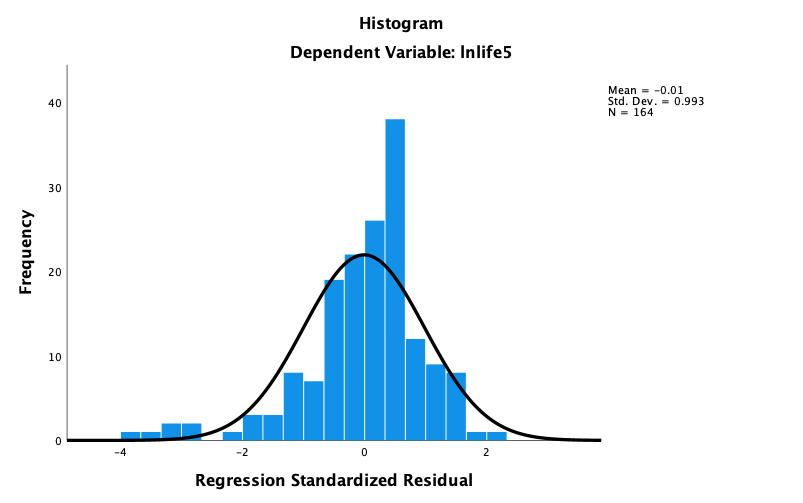


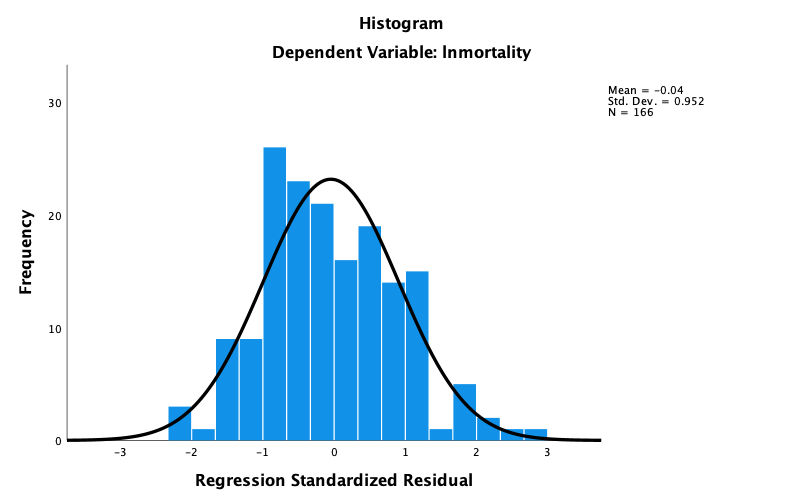

Supplement: Supplementary file 1 [file get_supplementary_file.php]
